# Supplementary material for: Large-scale features and evaluation of the PMIP4-CMIP6 midHolocene simulations
Source: Copernicus journal article supplement (doi:10.5194/cp-2019-168), 2020-01-16
Supplement: Supplementary file [file cp-2019-168-AC4-supplement.zip]

C20-Reanalysis

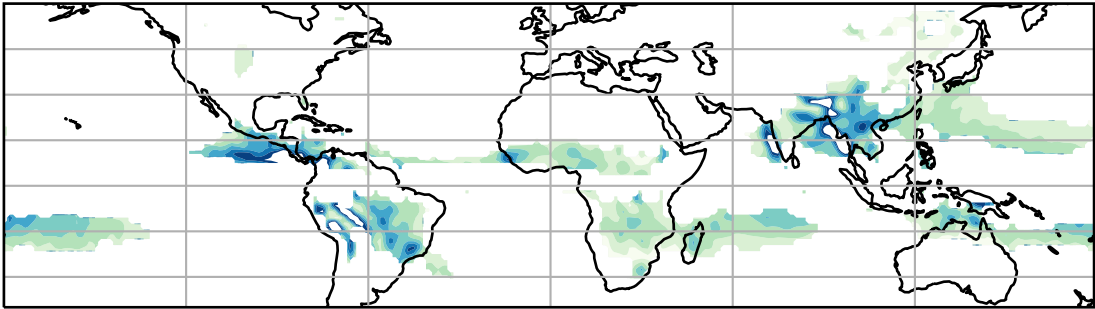

midHolocene

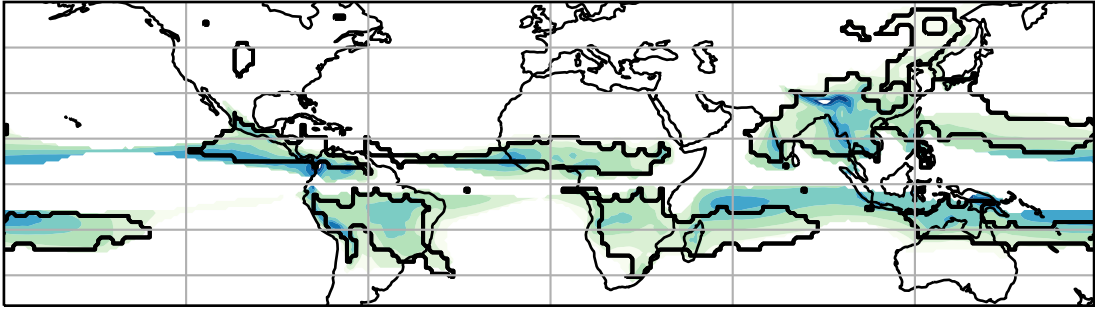

piControl

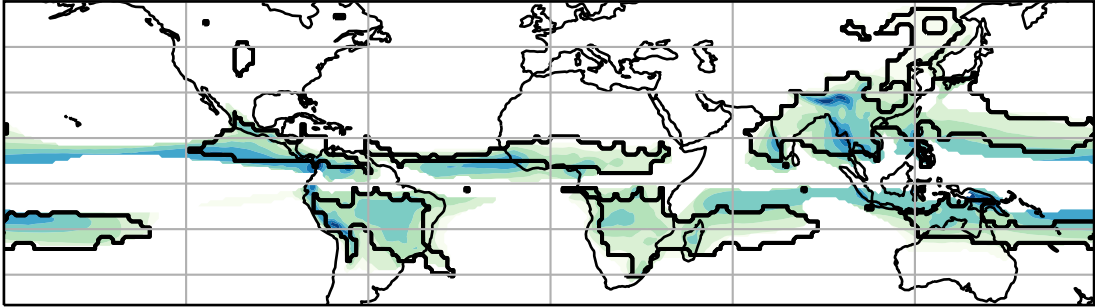

$\Delta$  monsoon intensity

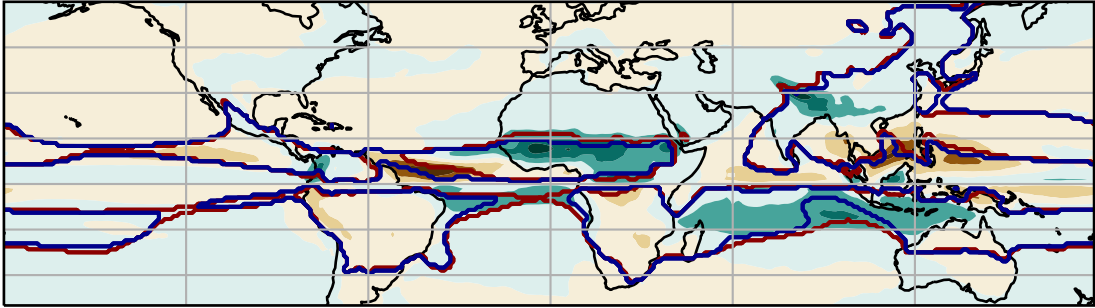

$\Delta$  monsoon summer rainrate

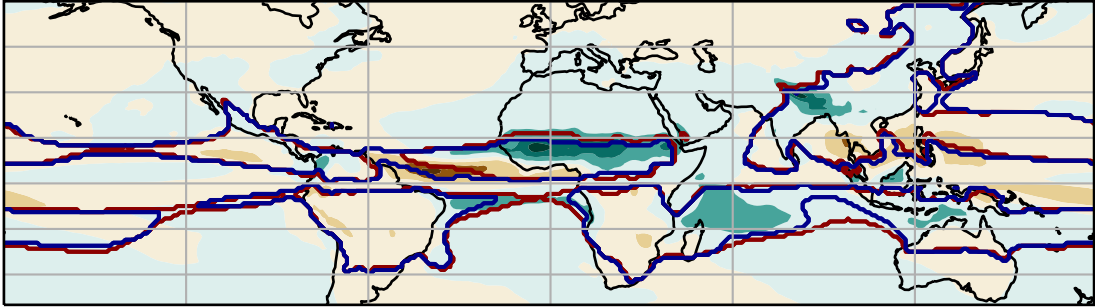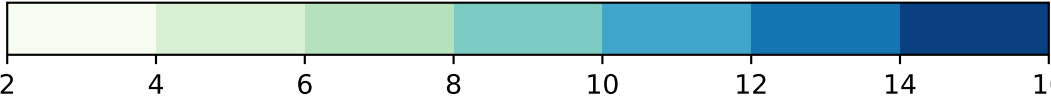

Summer Rainrate (mm/day)

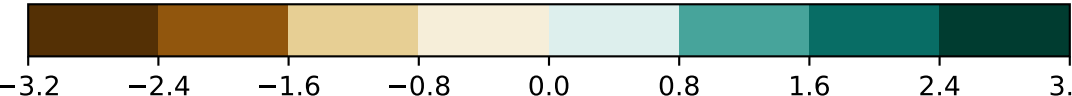

Changes (mm/day)
