# Supplementary material for: Large-scale features and evaluation of the PMIP4-CMIP6 midHolocene simulations
Source: Copernicus journal article supplement (doi:10.5194/cp-2019-168), 2020-01-16

IPSL-CM6A-LR\_midHolocene\_sicont\_Slday\_ave\_max

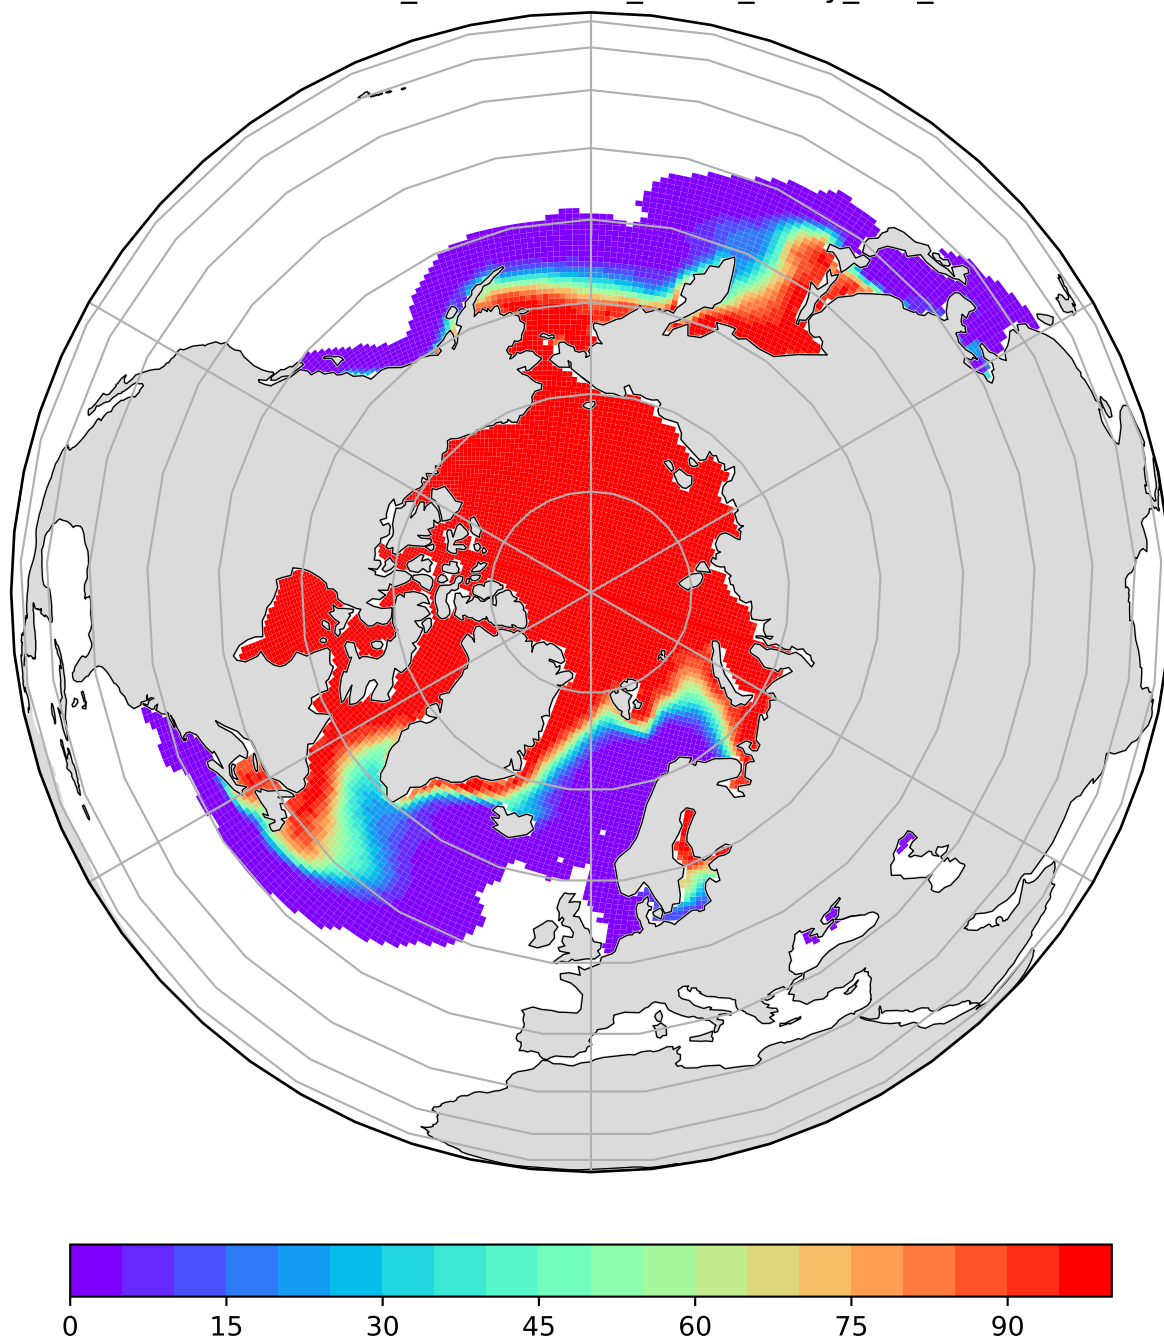

Supplement: Supplementary file [file cp-2019-168-AC4-supplement.zip]
